# Supplementary material for: Identification of Potent Chemotypes Targeting Leishmania major Using a High-Throughput, Low-Stringency, Computationally Enhanced, Small Molecule Screen
Source: PubMed Central journal article supplement (PMC2765639; doi:10.1371/journal.pntd.0000540), 2009-11-03
Supplement: pntd.0000540.s003.pdf [file pntd.0000540.s003.pdf]

| Pubchem CID | EC <sub>50</sub> (nM)<br>Ave ± SD | Pubchem AID/Active<br>Flags/Confirmed | Predictive <i>in silico</i> ADMET                                   |                                                                        |                                                                                  |                            |
|-------------|-----------------------------------|---------------------------------------|---------------------------------------------------------------------|------------------------------------------------------------------------|----------------------------------------------------------------------------------|----------------------------|
|             |                                   |                                       | Test (RI)                                                           | [CYP] IC <sub>50</sub> < 50 uM ,<br>IC <sub>50</sub> < 10 uM (RI)      | Mouse LD <sub>50</sub><br>(mg/kg) (RI)                                           | Tanimoto Score<br>(SSG/AB) |
| 2007        | Lm: 177 ± 3<br>A549: >5000        | 171/2/0                               | AMES= 0.709 (0.18)<br>hERG= 0 (0.51)<br>SI= 0.13<br>OB: Good        | CYP3A4= 0 (0.79) , 0 (0.87)<br>CYP2D6= 0.02 (0.29) , 0 (0.59)          | IP = 500 (0.46)<br>OR = 800 (0.15)<br>IV = 210 (0.32)<br>SC = 720 (0.43)         | 0.2/0.2                    |
| 2812        | Lm: 147 ± 30<br>A549: >5000       | 345/25/13                             | AMES= 0.207 (0.42)<br>hERG= 0.94 (0.46)<br>SI= 0.49<br>OB: Moderate | CYP3A4= 0.94 (0.63) , 0.85 (0.54)<br>CYP2D6= 0.61 (0.53) , 0.07 (0.6)  | IP = 260 (0.47)<br>OR = 1000 (0.33)<br>IV = 27.74 (0.42)<br>SC = 220 (0.36)      | 0.03/0.02                  |
| 3117        | Lm: 263 ± 20<br>A549: 2163 ± 1222 | 160/12/3                              | AMES= 0.436 (0.48)<br>hERG= 0.15 (0.23)<br>SI= 0.3<br>OB: Poor      | CYP3A4= 0.3 (0.56) , 0.02 (0.81)<br>CYP2D6= 0.07 (0.79) , 0.06 (0.75)  | IP = 310 (0.34)<br>OR = 1700 (0.8)<br>IV = 46.74 (0.23)<br>SC = 890 (0.7)        | 0.04/0.02                  |
| 5455        | Lm: 98 ± 12<br>A549: 750 ± 2      | 369/89/79                             | AMES= 0.651 (0.47)<br>hERG= 0.04 (0.34)<br>SI= 0.32<br>OB: Moderate | CYP3A4= 0.16 (0.51) , 0.02 (0.81)<br>CYP2D6= 0.05 (0.76) , 0.04 (0.63) | IP = 150 (0.56)<br>OR = 1400 (0.81)<br>IV = 51.06 (0.42)<br>SC = 1000 (0.71)     | 0.04/0.02                  |
| 11352       | Lm: 635 ± 26<br>A549: 4699 ± 311  | 213/20/5                              | AMES= 0.968 (1)<br>hERG= 0.49 (0.23)<br>SI= 0.37<br>OB: Good        | CYP3A4= 0.23 (0.33) , 0.08 (0.47)<br>CYP2D6= 0.17 (0.34) , 0.06 (0.52) | IP = 350 (0.43)<br>OR = 240 (0.33)<br>IV = 22.87 (0.58)<br>SC = 350 (0.84)       | 0.06/0.08                  |
| 89966       | Lm: 392 ± 40<br>A549: >5000       | 299/15/6                              | AMES= 0.459 (0.33)<br>hERG= 0.06 (0.28)<br>SI= 0.35<br>OB: Good     | CYP3A4= 0.05 (0.77) , 0.01 (0.7)<br>CYP2D6= 0.11 (0.56) , 0.07 (0.45)  | IP = 280 (0.55)<br>OR = 960 (0.49)<br>IV = 47.04 (0.41)<br>SC = 260 (0.52)       | 0.02/0.03                  |
| 298107      | Lm: 502 ± 87<br>A549: >5000       | 282/9/0                               | AMES= 0.081 (0.8)<br>hERG= 0.73 (0.48)<br>SI= 0.37<br>OB: Moderate  | CYP3A4= 0.49 (0.2) , 0.06 (0.38)<br>CYP2D6= 0.84 (0.36) , 0.5 (0.08)   | IP = 97.64 (0.74)<br>OR = 310 (0.56)<br>IV = 42.46 (0.88)<br>SC = 230 (0.53)     | 0.3/0.17                   |
| 359323      | Lm: 46 ± 12<br>A549: >5000        | 217/10/2                              | AMES= 0.032 (0.74)<br>hERG= 0.33 (0.47)<br>SI= 0.39<br>OB: Poor     | CYP3A4= 0.48 (0.72) , 0.11 (0.84)<br>CYP2D6= 0.19 (0.59) , 0.11 (0.65) | IP = 68.71 (0.79)<br>OR = 680 (0.42)<br>IV = 28.35 (0.83)<br>SC = 92.87 (0.79)   | 0.2/0.1                    |
| 380438      | Lm: 117 ± 22<br>A549: >5000       | 249/3/0                               | AMES= 0.675 (0.23)<br>hERG= 0.21 (0.1)<br>SI= 0.99<br>OB: Moderate  | CYP3A4= 0.31 (0.1) , 0.03 (0.41)<br>CYP2D6= 0.08 (0.26) , 0.01 (0.16)  | IP = 360 (0.41)<br>OR = 1100 (0.48)<br>IV = 57.17 (0.33)<br>SC = 430 (0.33)      | 0.03/0.03                  |
| 422270      | Lm: 289 ± 44<br>A549: 2919 ± 320  | 146/10/3                              | AMES= 0.321 (0.11)<br>hERG= 0.45 (0.12)<br>SI= 0.74<br>OB: Good     | CYP3A4= 0.35 (0.15) , 0.09 (0.18)<br>CYP2D6= 0.07 (0.33) , 0.03 (0.26) | IP = 110 (0.33)<br>OR = 720 (0.44)<br>IV = 28.74 (0.43)<br>SC = 220 (0.43)       | 0.06/0.05                  |
| 457964      | Lm: 121 ± 20<br>A549: >5000       | 274/18/8                              | AMES= 0.07 (0.43)<br>hERG= 0.02 (0.28)<br>SI= 0.28<br>OB: Good      | CYP3A4= 0.04 (0.53) , 0.01 (0.71)<br>CYP2D6= 0.02 (0.58) , 0.01 (0.67) | IP = 35.64 (0.32)<br>OR = 81.07 (0.35)<br>IV = 30.33 (0.25)<br>SC = 96.64 (0.24) | 0.27/0.19                  |
| 460747      | Lm: 202 ± 11<br>A549: 158 ± 18    | 224/56/19                             | AMES= 0.555 (0.25)<br>hERG= 0.04 (0.28)<br>SI= 0.34<br>OB: Good     | CYP3A4= 0.02 (0.56) , 0 (0.61)<br>CYP2D6= 0.02 (0.55) , 0.01 (0.6)     | IP = 72.05 (0.26)<br>OR = 170 (0.67)<br>IV = 20.09 (0.83)<br>SC = 46.91 (0.52)   | 0.08/0.07                  |

| Pubchem CID | EC <sub>50</sub> (nM)<br>Ave ± SD | Pubchem AID/Active<br>Flags/Confirmed | Predictive <i>in silico</i> ADMET                                   |                                                                        |                                                                                |                            |
|-------------|-----------------------------------|---------------------------------------|---------------------------------------------------------------------|------------------------------------------------------------------------|--------------------------------------------------------------------------------|----------------------------|
|             |                                   |                                       | Test (RI)                                                           | [CYP] IC <sub>50</sub> < 50 uM ,<br>IC <sub>50</sub> < 10 uM (RI)      | Mouse LD <sub>50</sub><br>(mg/kg) (RI)                                         | Tanimoto Score<br>(SSG/AB) |
| 625053      | Lm: 403 ± 31<br>A549: >5000       | 149/2/0                               | AMES= 0.986 (0.77)<br>hERG= 0.26 (0.09)<br>SI= 0.99<br>OB: Good     | CYP3A4= 0.76 (0.27) , 0.05 (0.3)<br>CYP2D6= 0.27 (0.53) , 0.08 (0.22)  | IP = 360 (0.51)<br>OR = 710 (0.51)<br>IV = 100 (0.65)<br>SC = 300 (0.49)       | 0.08/0.07                  |
| 629413      | Lm: 379 ± 77<br>A549: >5000       | 165/6/0                               | AMES= 0.246 (0.55)<br>hERG= 0.83 (0.57)<br>SI= 0.73<br>OB: Poor     | CYP3A4= 0.67 (0.78) , 0.38 (0.67)<br>CYP2D6= 0.87 (0.57) , 0.34 (0.53) | IP = 59.78 (0.72)<br>OR = 230 (0.54)<br>IV = 12.79 (0.83)<br>SC = 20.46 (0.82) | 0.03/0.08                  |
| 644992      | Lm: 255 ± 21<br>A549: >5000       | 178/23/8                              | AMES= 0.726 (0.15)<br>hERG= 0.35 (0.1)<br>SI= 0.33<br>OB: Good      | CYP3A4= 0.47 (0.15) , 0.05 (0.23)<br>CYP2D6= 0.3 (0.22) , 0.17 (0.17)  | IP = 350 (0.34)<br>OR = 350 (0.48)<br>IV = 49.11 (0.56)<br>SC = 73.17 (0.63)   | 0.06/0.07                  |
| 645317      | Lm: 723 ± 24<br>A549: >5000       | 290/3/0                               | AMES= 0.246 (0.16)<br>hERG= 0.24 (0.12)<br>SI= 0.32<br>OB: Moderate | CYP3A4= 0.6 (0.15) , 0.08 (0.43)<br>CYP2D6= 0.13 (0.27) , 0.05 (0.4)   | IP = 320 (0.36)<br>OR = 580 (0.42)<br>IV = 71.55 (0.55)<br>SC = 180 (0.37)     | 0.05/0.05                  |
| 657546      | Lm: 845 ± 136<br>A549: >5000      | 321/35/15                             | AMES= 0.3 (0.13)<br>hERG= 0.68 (0.21)<br>SI= 0.35<br>OB: Moderate   | CYP3A4= 0.49 (0.09) , 0.05 (0.3)<br>CYP2D6= 0.45 (0.29) , 0.25 (0.09)  | IP = 91.92 (0.18)<br>OR = 390 (0.22)<br>IV = 22.69 (0.28)<br>SC = 140 (0.28)   | 0.08/0.13                  |
| 728862      | Lm: 392 ± 50<br>A549: >5000       | 274/3/0                               | AMES= 0.337 (0.18)<br>hERG= 0.36 (0.09)<br>SI= 0.63<br>OB: Good     | CYP3A4= 0.27 (0.14) , 0.02 (0.36)<br>CYP2D6= 0.88 (0.14) , 0.34 (0.21) | IP = 390 (0.61)<br>OR = 340 (0.4)<br>IV = 79.06 (0.53)<br>SC = 270 (0.29)      | 0.05/0.01                  |
| 742546      | Lm: 827 ± 116<br>A549: >5000      | 162/2/0                               | AMES= 0.097 (0.22)<br>hERG= 0.79 (0.11)<br>SI= 0.71<br>OB: Moderate | CYP3A4= 0.17 (0.12) , 0.01 (0.44)<br>CYP2D6= 0.88 (0.17) , 0.67 (0.24) | IP = 56.8 (0.49)<br>OR = 190 (0.45)<br>IV = 79.46 (0.68)<br>SC = 340 (0.65)    | 0/0.02                     |
| 757789      | Lm: 353 ± 25<br>A549: >5000       | 316/20/8                              | AMES= 0.895 (0.35)<br>hERG= 0.27 (0.2)<br>SI= 0.32<br>OB: Good      | CYP3A4= 0.2 (0.35) , 0.02 (0.38)<br>CYP2D6= 0.11 (0.22) , 0.05 (0.41)  | IP = 89.1 (0.65)<br>OR = 390 (0.42)<br>IV = 16.38 (0.44)<br>SC = 58.83 (0.48)  | 0.08/0.05                  |
| 759209      | Lm: 545 ± 118<br>A549: 2576 ± 185 | 152/13/4                              | AMES= 0.738 (0.41)<br>hERG= 0.64 (0.19)<br>SI= 0.32<br>OB: Good     | CYP3A4= 0.09 (0.26) , 0.02 (0.42)<br>CYP2D6= 0.08 (0.31) , 0.08 (0.33) | IP = 780 (0.36)<br>OR = 760 (0.41)<br>IV = 63.39 (0.33)<br>SC = 860 (0.48)     | 0.03/0.03                  |
| 760847      | Lm: 108 ± 23<br>A549: >5000       | 300/8/1                               | AMES= 0.432 (0.28)<br>hERG= 0.42 (0.15)<br>SI= 0.31<br>OB: Moderate | CYP3A4= 0.51 (0.17) , 0.08 (0.39)<br>CYP2D6= 0.65 (0.18) , 0.22 (0.28) | IP = 270 (0.32)<br>OR = 610 (0.27)<br>IV = 52.69 (0.28)<br>SC = 370 (0.41)     | 0.1/0.1                    |
| 786799      | Lm: 180 ± 35<br>A549: >5000       | 193/4/0                               | AMES= 0.143 (0.33)<br>hERG= 0.58 (0.22)<br>SI= 0.98<br>OB: Moderate | CYP3A4= 0.62 (0.13) , 0.21 (0.14)<br>CYP2D6= 0.08 (0.13) , 0.02 (0.28) | IP = 380 (0.45)<br>OR = 2200 (0.19)<br>IV = 82.36 (0.51)<br>SC = 250 (0.51)    | 0.01/0.02                  |
| 871185      | Lm: 287 ± 145<br>A549: >5000      | 314/23/7                              | AMES= 0.261 (0.22)<br>hERG= 0.52 (0.21)<br>SI= 0.91<br>OB: Good     | CYP3A4= 0.74 (0.1) , 0.25 (0.29)<br>CYP2D6= 0.13 (0.53) , 0.02 (0.38)  | IP = 800 (0.38)<br>OR = 4400 (0.35)<br>IV = 200 (0.52)<br>SC = 1800 (0.43)     | 0.1/0.01                   |

| Pubchem CID | EC <sub>50</sub> (nM)<br>Ave ± SD | Pubchem AID/Active<br>Flags/Confirmed | Predictive <i>in silico</i> ADMET                                   |                                                                        |                                                                               |                            |
|-------------|-----------------------------------|---------------------------------------|---------------------------------------------------------------------|------------------------------------------------------------------------|-------------------------------------------------------------------------------|----------------------------|
|             |                                   |                                       | Test (RI)                                                           | [CYP] IC <sub>50</sub> < 50 uM ,<br>IC <sub>50</sub> < 10 uM (RI)      | Mouse LD <sub>50</sub><br>(mg/kg) (RI)                                        | Tanimoto Score<br>(SSG/AB) |
| 952234      | Lm: 205 ± 21<br>A549: 4082 ± 352  | 152/6/1                               | AMES= 0.891 (0.54)<br>hERG= 0.14 (0.23)<br>SI= 0.87<br>OB: Good     | CYP3A4= 0.32 (0.18) , 0.1 (0.24)<br>CYP2D6= 0.05 (0.33) , 0.02 (0.53)  | IP = 420 (0.44)<br>OR = 1700 (0.17)<br>IV = 130 (0.48)<br>SC = 510 (0.4)      | 0.1/0.1                    |
| 1471937     | Lm: 513 ± 52<br>A549: 4313 ± 540  | 195/13/3                              | AMES= 0.236 (0.06)<br>hERG= 0.9 (0.35)<br>SI= 0.29<br>OB: Moderate  | CYP3A4= 0.27 (0.37) , 0.1 (0.21)<br>CYP2D6= 0.12 (0.51) , 0.16 (0.09)  | IP = 690 (0.35)<br>OR = 940 (0.4)<br>IV = 87.15 (0.24)<br>SC = 210 (0.31)     | 0.06/0.07                  |
| 1475345     | Lm: 242 ± 29<br>A549: 955 ± 25    | 150/23/4                              | AMES= 0.717 (0.33)<br>hERG= 0.96 (0.16)<br>SI= 0.53<br>OB: Good     | CYP3A4= 0.86 (0.27) , 0.37 (0.4)<br>CYP2D6= 0.2 (0.32) , 0.08 (0.38)   | IP = 50.13 (0.42)<br>OR = 820 (0.43)<br>IV = 32.94 (0.34)<br>SC = 6600 (0.15) | 0.09/0.1                   |
| 1537038     | Lm: 784 ± 36<br>A549: >5000       | 143/5/1                               | AMES= 0.658 (0.18)<br>hERG= 0.33 (0.11)<br>SI= 0.32<br>OB: Moderate | CYP3A4= 0.38 (0.24) , 0.09 (0.22)<br>CYP2D6= 0.35 (0.35) , 0.08 (0.31) | IP = 110 (0.6)<br>OR = 440 (0.65)<br>IV = 47.45 (0.69)<br>SC = 380 (0.5)      | 0.06/0.03                  |
| 1736381     | Lm: 87 ± 21<br>A549: 613 ± 109    | 99/18/6                               | AMES= 0.705 (0.29)<br>hERG= 0.14 (0.06)<br>SI= 0.5<br>OB: Poor      | CYP3A4= 0.28 (0.29) , 0.03 (0.28)<br>CYP2D6= 0.09 (0.35) , 0.08 (0.41) | IP = 480 (0.5)<br>OR = 350 (0.08)<br>IV = 260 (0.24)<br>SC = 240 (0.36)       | 0.08/0.08                  |
| 1811924     | Lm: 166 ± 9<br>A549: >5000        | 170/12/2                              | AMES= 0.363 (0.15)<br>hERG= 0.05 (0.37)<br>SI= 0.58<br>OB: Poor     | CYP3A4= 0.56 (0.38) , 0.03 (0.46)<br>CYP2D6= 0.16 (0.31) , 0.05 (0.34) | IP = 500 (0.39)<br>OR = 1100 (0.56)<br>IV = 130 (0.36)<br>SC = 340 (0.24)     | 0.07/0.1                   |
| 1987332     | Lm: 85 ± 5<br>A549: >5000         | 174/7/3                               | AMES= 0.697 (0.14)<br>hERG= 0.85 (0.23)<br>SI= 0.26<br>OB: Moderate | CYP3A4= 0.8 (0.19) , 0.08 (0.35)<br>CYP2D6= 0.04 (0.38) , 0.01 (0.39)  | IP = 690 (0.63)<br>OR = 610 (0.31)<br>IV = 37.71 (0.44)<br>SC = 87.85 (0.3)   | 0.06/0.1                   |
| 2137463     | Lm: 499 ± 135<br>A549: >5000      | 155/7/0                               | AMES= 0.744 (0.13)<br>hERG= 0.19 (0.17)<br>SI= 0.31<br>OB: Good     | CYP3A4= 0.26 (0.25) , 0.03 (0.36)<br>CYP2D6= 0.16 (0.33) , 0.06 (0.32) | IP = 340 (0.39)<br>OR = 470 (0.58)<br>IV = 130 (0.3)<br>SC = 410 (0.31)       | 0.04/0.04                  |
| 2194030     | Lm: 718 ± 86<br>A549: >5000       | 214/16/0                              | AMES= 0.678 (0.33)<br>hERG= 0.37 (0.08)<br>SI= 0.29<br>OB: Moderate | CYP3A4= 0.31 (0.63) , 0.1 (0.67)<br>CYP2D6= 0.1 (0.39) , 0.04 (0.5)    | IP = 300 (0.59)<br>OR = 610 (0.29)<br>IV = 120 (0.61)<br>SC = 100 (0.23)      | 0.05/0.04                  |
| 2766929     | Lm: 767 ± 160<br>A549: 3546 ± 582 | 157/15/2                              | AMES= 0.165 (0.25)<br>hERG= 0.55 (0.11)<br>SI= 0.86<br>OB: Moderate | CYP3A4= 0.59 (0.24) , 0.08 (0.44)<br>CYP2D6= 0.04 (0.32) , 0.02 (0.35) | IP = 460 (0.35)<br>OR = 430 (0.21)<br>IV = 59.18 (0.24)<br>SC = 89.97 (0.23)  | 0.07/0.06                  |
| 2846928     | Lm: 35 ± 1<br>A549: 1635 ± 59     | 158/19/3                              | AMES= 0.103 (0.34)<br>hERG= 0.99 (0.51)<br>SI= 0.7<br>OB: Poor      | CYP3A4= 0.09 (0.63) , 0.04 (0.75)<br>CYP2D6= 0.57 (0.47) , 0.22 (0.4)  | IP = 29.59 (0.66)<br>OR = 560 (0.58)<br>IV = 27.68 (0.66)<br>SC = 440 (0.56)  | 0.02/0.03                  |
| 2851545     | Lm: 133 ± 35<br>A549: >5000       | 301/5/0                               | AMES= 0.103 (0.18)<br>hERG= 0.7 (0.34)<br>SI= 0.57<br>OB: Moderate  | CYP3A4= 0.52 (0.2) , 0.45 (0.39)<br>CYP2D6= 0.67 (0.36) , 0.36 (0.19)  | IP = 240 (0.44)<br>OR = 1600 (0.56)<br>IV = 61.19 (0.56)<br>SC = 440 (0.38)   | 0.05/0.06                  |

| Pubchem<br>CID | EC <sub>50</sub> (nM)<br>Ave ± SD | Pubchem AID/Active<br>Flags/Confirmed | Predictive <i>in silico</i> ADMET                                   |                                                                        |                                                                               |                            |
|----------------|-----------------------------------|---------------------------------------|---------------------------------------------------------------------|------------------------------------------------------------------------|-------------------------------------------------------------------------------|----------------------------|
|                |                                   |                                       | Test (RI)                                                           | [CYP] IC <sub>50</sub> < 50 uM ,<br>IC <sub>50</sub> < 10 uM (RI)      | Mouse LD <sub>50</sub><br>(mg/kg) (RI)                                        | Tanimoto Score<br>(SSG/AB) |
| 2855568        | Lm: 122 ± 12<br>A549: >5000       | 257/5/0                               | AMES= 0.071 (0.35)<br>hERG= 0.19 (0.27)<br>SI= 0.85<br>OB: Poor     | CYP3A4= 0.7 (0.14) , 0.11 (0.46)<br>CYP2D6= 0.1 (0.38) , 0.07 (0.34)   | IP = 920 (0.64)<br>OR = 710 (0.33)<br>IV = 94.14 (0.38)<br>SC = 73.61 (0.3)   | 0.09/0.1                   |
| 2856077        | Lm: 751 ± 110<br>A549: >5000      | 194/9/1                               | AMES= 0.907 (0.58)<br>hERG= 0.45 (0.19)<br>SI= 0.91<br>OB: Moderate | CYP3A4= 0.7 (0.21) , 0.04 (0.52)<br>CYP2D6= 0.35 (0.17) , 0.17 (0.26)  | IP = 630 (0.66)<br>OR = 1300 (0.54)<br>IV = 85.49 (0.74)<br>SC = 380 (0.42)   | 0.05/0.03                  |
| 2923184        | Lm: 60 ± 0.1<br>A549: >5000       | 163/3/0                               | AMES= 0.084 (0.41)<br>hERG= 0.77 (0.13)<br>SI= 0.42<br>OB: Moderate | CYP3A4= 0.25 (0.24) , 0.06 (0.41)<br>CYP2D6= 0.4 (0.27) , 0.25 (0.27)  | IP = 260 (0.46)<br>OR = 440 (0.63)<br>IV = 45.62 (0.45)<br>SC = 460 (0.57)    | 0.1/0.1                    |
| 2937831        | Lm: 255 ± 48<br>A549: >5000       | 150/2/0                               | AMES= 0.331 (0.16)<br>hERG= 0.41 (0.11)<br>SI= 0.3<br>OB: Moderate  | CYP3A4= 0.6 (0.21) , 0.06 (0.31)<br>CYP2D6= 0.16 (0.17) , 0.04 (0.35)  | IP = 250 (0.23)<br>OR = 890 (0.31)<br>IV = 41.35 (0.43)<br>SC = 350 (0.31)    | 0.04/0.04                  |
| 2946668        | Lm: 515 ± 66<br>A549: >5000       | 269/5/0                               | AMES= 0.316 (0.36)<br>hERG= 0.1 (0.18)<br>SI= 0.27<br>OB: Moderate  | CYP3A4= 0.81 (0.31) , 0.44 (0.25)<br>CYP2D6= 0.05 (0.23) , 0.01 (0.42) | IP = 470 (0.45)<br>OR = 360 (0.26)<br>IV = 71.23 (0.28)<br>SC = 260 (0.3)     | 0.07/0.07                  |
| 2964134        | Lm: 164 ± 42<br>A549: >5000       | 189/3/0                               | AMES= 0.164 (0.22)<br>hERG= 0.48 (0.15)<br>SI= 0.3<br>OB: Moderate  | CYP3A4= 0.85 (0.3) , 0.38 (0.24)<br>CYP2D6= 0.83 (0.22) , 0.55 (0.21)  | IP = 240 (0.57)<br>OR = 850 (0.52)<br>IV = 49.3 (0.57)<br>SC = 270 (0.27)     | 0.07/0.09                  |
| 2999476        | Lm: 187 ± 26<br>A549: >5000       | 304/4/0                               | AMES= 0.482 (0.1)<br>hERG= 0.7 (0.19)<br>SI= 0.27<br>OB: Moderate   | CYP3A4= 0.94 (0.19) , 0.55 (0.23)<br>CYP2D6= 0.79 (0.32) , 0.34 (0.2)  | IP = 680 (0.23)<br>OR = 570 (0.2)<br>IV = 88.86 (0.23)<br>SC = 94.7 (0.2)     | 0.02/0.04                  |
| 3127155        | Lm: 452 ± 74<br>A549: >5000       | 194/4/1                               | AMES= 0.914 (0.43)<br>hERG= 0.14 (0.29)<br>SI= 0.91<br>OB: Good     | CYP3A4= 0.65 (0.16) , 0.07 (0.36)<br>CYP2D6= 0.22 (0.25) , 0.05 (0.4)  | IP = 560 (0.3)<br>OR = 380 (0.47)<br>IV = 120 (0.36)<br>SC = 620 (0.41)       | 0.07/0.05                  |
| 3164059        | Lm: 218 ± 54<br>A549: 1059 ± 156  | 162/34/11                             | AMES= 0.525 (0.26)<br>hERG= 0.09 (0.23)<br>SI= 0.33<br>OB: Good     | CYP3A4= 0.03 (0.46) , 0 (0.59)<br>CYP2D6= 0.02 (0.53) , 0.01 (0.59)    | IP = 69.95 (0.23)<br>OR = 180 (0.66)<br>IV = 18.97 (0.8)<br>SC = 43.55 (0.52) | 0.08/0.07                  |
| 3236501        | Lm: 105 ± 10<br>A549: >5000       | 332/5/0                               | AMES= 0.327 (0.1)<br>hERG= 0.35 (0.07)<br>SI= 0.44<br>OB: Moderate  | CYP3A4= 0.71 (0.19) , 0.65 (0.19)<br>CYP2D6= 0.29 (0.13) , 0.04 (0.37) | IP = 460 (0.46)<br>OR = 1100 (0.29)<br>IV = 70.96 (0.54)<br>SC = 450 (0.38)   | 0.04/0.07                  |
| 3237155        | Lm: 743 ± 62<br>A549: >5000       | 246/3/0                               | AMES= 0.512 (0.27)<br>hERG= 0.25 (0.12)<br>SI= 0.3<br>OB: Poor      | CYP3A4= 0.9 (0.39) , 0.36 (0.19)<br>CYP2D6= 0.87 (0.37) , 0.17 (0.41)  | IP = 580 (0.3)<br>OR = 420 (0.16)<br>IV = 99.8 (0.38)<br>SC = 580 (0.31)      | 0.1/0.2                    |
| 3242548        | Lm: 111 ± 10<br>A549: >5000       | 270/2/0                               | AMES= 0.317 (0.1)<br>hERG= 0.82 (0.15)<br>SI= 0.87<br>OB: Moderate  | CYP3A4= 0.85 (0.15) , 0.27 (0.27)<br>CYP2D6= 0.72 (0.15) , 0.37 (0.18) | IP = 110 (0.68)<br>OR = 460 (0.35)<br>IV = 76.69 (0.5)<br>SC = 200 (0.54)     | 0.05/0.09                  |

| Pubchem CID | EC <sub>50</sub> (nM)<br>Ave ± SD | Pubchem AID/Active<br>Flags/Confirmed | Predictive <i>in silico</i> ADMET                                   |                                                                        |                                                                              |                            |
|-------------|-----------------------------------|---------------------------------------|---------------------------------------------------------------------|------------------------------------------------------------------------|------------------------------------------------------------------------------|----------------------------|
|             |                                   |                                       | Test (RI)                                                           | [CYP] IC <sub>50</sub> < 50 uM ,<br>IC <sub>50</sub> < 10 uM (RI)      | Mouse LD <sub>50</sub><br>(mg/kg) (RI)                                       | Tanimoto Score<br>(SSG/AB) |
| 3521510     | Lm: 326 ± 40<br>A549: >5000       | 163/2/0                               | AMES= 0.802 (0.68)<br>hERG= 0.09 (0.19)<br>SI= 0.39<br>OB: Moderate | CYP3A4= 0.71 (0.25) , 0.14 (0.33)<br>CYP2D6= 0.14 (0.25) , 0.04 (0.33) | IP = 400 (0.26)<br>OR = 150 (0.28)<br>IV = 100 (0.57)<br>SC = 170 (0.36)     | 0.01/0                     |
| 3536067     | Lm: 636 ± 60<br>A549: >5000       | 163/8/2                               | AMES= 0.977 (0.86)<br>hERG= 0.01 (0.32)<br>SI= 0.99<br>OB: Moderate | CYP3A4= 0.22 (0.28) , 0.01 (0.47)<br>CYP2D6= 0.12 (0.28) , 0.05 (0.23) | IP = 450 (0.6)<br>OR = 640 (0.45)<br>IV = 190 (0.62)<br>SC = 520 (0.51)      | 0.1/0.1                    |
| 3564202     | Lm: 565 ± 35<br>A549: 2106 ± 77   | 220/27/5                              | AMES= 0.064 (0.55)<br>hERG= 0.94 (0.68)<br>SI= 0.29<br>OB: Moderate | CYP3A4= 0.94 (0.22) , 0.75 (0.32)<br>CYP2D6= 0.09 (0.33) , 0.02 (0.29) | IP = 270 (0.32)<br>OR = 330 (0.42)<br>IV = 56.14 (0.48)<br>SC = 72.69 (0.24) | 0.03/0.03                  |
| 3609942     | Lm: 73 ± 13<br>A549: 2748 ± 73    | 205/35/12                             | AMES= 0.86 (0.13)<br>hERG= 0.71 (0.12)<br>SI= 0.27<br>OB: Poor      | CYP3A4= 0.94 (0.09) , 0.34 (0.19)<br>CYP2D6= 0.07 (0.2) , 0.02 (0.33)  | IP = 600 (0.49)<br>OR = 880 (0.55)<br>IV = 24.53 (0.52)<br>SC = 16.53 (0.17) | 0.04/0.07                  |
| 3769434     | Lm: 504 ± 66<br>A549: >5000       | 152/5/2                               | AMES= 0.34 (0.44)<br>hERG= 0.54 (0.09)<br>SI= 0.54<br>OB: Good      | CYP3A4= 0.37 (0.22) , 0.06 (0.51)<br>CYP2D6= 0.25 (0.37) , 0.08 (0.63) | IP = 310 (0.44)<br>OR = 680 (0.35)<br>IV = 91.91 (0.29)<br>SC = 190 (0.36)   | 0.09/0.1                   |
| 3932660     | Lm: 61 ± 4<br>A549: >5000         | 211/6/2                               | AMES= 0.982 (0.8)<br>hERG= 0.28 (0.08)<br>SI= 0.99<br>OB: Good      | CYP3A4= 0.64 (0.17) , 0.1 (0.56)<br>CYP2D6= 0.32 (0.49) , 0.14 (0.49)  | IP = 400 (0.43)<br>OR = 500 (0.69)<br>IV = 77.78 (0.3)<br>SC = 460 (0.49)    | 0.03/0.03                  |
| 3980962     | Lm: 192 ± 2<br>A549: >5000        | 168/5/2                               | AMES= 0.536 (0.22)<br>hERG= 0.49 (0.08)<br>SI= 0.9<br>OB: Moderate  | CYP3A4= 0.94 (0.29) , 0.24 (0.22)<br>CYP2D6= 0.02 (0.33) , 0.01 (0.27) | IP = 980 (0.51)<br>OR = 1100 (0.45)<br>IV = 270 (0.49)<br>SC = 730 (0.38)    | 0.04/0.04                  |
| 4202676     | Lm: 767 ± 76<br>A549: >5000       | 152/6/2                               | AMES= 0.635 (0.11)<br>hERG= 0.06 (0.46)<br>SI= 0.33<br>OB: Good     | CYP3A4= 0.31 (0.3) , 0.03 (0.47)<br>CYP2D6= 0.13 (0.24) , 0.05 (0.42)  | IP = 430 (0.64)<br>OR = 450 (0.69)<br>IV = 210 (0.4)<br>SC = 340 (0.37)      | 0.06/0.04                  |
| 4271960     | Lm: 545 ± 193<br>A549: >5000      | 163/4/0                               | AMES= 0.525 (0.08)<br>hERG= 0.75 (0.18)<br>SI= 0.47<br>OB: Moderate | CYP3A4= 0.75 (0.13) , 0.11 (0.34)<br>CYP2D6= 0.16 (0.22) , 0.07 (0.28) | IP = 840 (0.35)<br>OR = 690 (0.31)<br>IV = 86.7 (0.49)<br>SC = 100 (0.29)    | 0.06/0.07                  |
| 5032706     | Lm: 856 ± 33<br>A549: >5000       | 167/2/0                               | AMES= 0.692 (0.24)<br>hERG= 0.17 (0.24)<br>SI= 0.31<br>OB: Good     | CYP3A4= 0.27 (0.13) , 0.05 (0.36)<br>CYP2D6= 0.13 (0.13) , 0.02 (0.29) | IP = 340 (0.34)<br>OR = 250 (0.18)<br>IV = 110 (0.48)<br>SC = 390 (0.32)     | 0.04/0.03                  |
| 5309827     | Lm: 382 ± 56<br>A549: >5000       | 286/7/1                               | AMES= 0.031 (0.14)<br>hERG= 0.54 (0.09)<br>SI= 0.45<br>OB: Moderate | CYP3A4= 0.66 (0.17) , 0.03 (0.25)<br>CYP2D6= 0.08 (0.16) , 0.06 (0.24) | IP = 710 (0.39)<br>OR = 2500 (0.33)<br>IV = 83.63 (0.4)<br>SC = 550 (0.35)   | 0.1/0.1                    |
| 5833488     | Lm: 788 ± 114<br>A549: 151 ± 10   | 150/16/2                              | AMES= 0.934 (0.17)<br>hERG= 0.18 (0.07)<br>SI= 0.31<br>OB: Poor     | CYP3A4= 0.7 (0.29) , 0.06 (0.36)<br>CYP2D6= 0.06 (0.28) , 0.01 (0.39)  | IP = 430 (0.49)<br>OR = 720 (0.35)<br>IV = 250 (0.27)<br>SC = 80.56 (0.26)   | 0.1/0.1                    |

| Pubchem CID | EC <sub>50</sub> (nM)<br>Ave ± SD | Pubchem AID/Active<br>Flags/Confirmed | Predictive <i>in silico</i> ADMET                                   |                                                                        |                                                                              |                            |
|-------------|-----------------------------------|---------------------------------------|---------------------------------------------------------------------|------------------------------------------------------------------------|------------------------------------------------------------------------------|----------------------------|
|             |                                   |                                       | Test (RI)                                                           | [CYP] IC <sub>50</sub> < 50 uM ,<br>IC <sub>50</sub> < 10 uM (RI)      | Mouse LD <sub>50</sub><br>(mg/kg) (RI)                                       | Tanimoto Score<br>(SSG/AB) |
| 6261459     | Lm: 306 ± 31<br>A549: >5000       | 170/9/1                               | AMES= 0.28 (0.22)<br>hERG= 0.61 (0.09)<br>SI= 0.73<br>OB: Moderate  | CYP3A4= 0.44 (0.28) , 0.03 (0.52)<br>CYP2D6= 0.33 (0.14) , 0.08 (0.22) | IP = 320 (0.38)<br>OR = 380 (0.42)<br>IV = 60.82 (0.28)<br>SC = 64.07 (0.21) | 0.07/0.1                   |
| 6602747     | Lm: 104 ± 27<br>A549: >5000       | 311/5/1                               | AMES= 0.139 (0.31)<br>hERG= 0.48 (0.12)<br>SI= 0.14<br>OB: Moderate | CYP3A4= 0.53 (0.17) , 0.06 (0.46)<br>CYP2D6= 0.7 (0.19) , 0.33 (0.1)   | IP = 200 (0.4)<br>OR = 1700 (0.23)<br>IV = 43.75 (0.4)<br>SC = 840 (0.41)    | 0.1/0.1                    |
| 6602880     | Lm: 10 ± 3<br>A549: >5000         | 286/7/1                               | AMES= 0.046 (0.2)<br>hERG= 0.62 (0.5)<br>SI= 0.94<br>OB: Moderate   | CYP3A4= 0.49 (0.15) , 0.1 (0.15)<br>CYP2D6= 0.44 (0.18) , 0.33 (0.18)  | IP = 350 (0.65)<br>OR = 650 (0.58)<br>IV = 37.36 (0.56)<br>SC = 200 (0.43)   | 0.01/0.03                  |
| 6603247     | Lm: 83 ± 5<br>A549: >5000         | 305/10/2                              | AMES= 0.301 (0.33)<br>hERG= 0.92 (0.16)<br>SI= 0.44<br>OB: Moderate | CYP3A4= 0.69 (0.3) , 0.1 (0.12)<br>CYP2D6= 0.4 (0.24) , 0.56 (0.11)    | IP = 170 (0.48)<br>OR = 660 (0.39)<br>IV = 46.76 (0.43)<br>SC = 41.63 (0.3)  | 0.02/0.06                  |
| 6603672     | Lm: 274 ± 51<br>A549: >5000       | 305/3/0                               | AMES= 0.086 (0.16)<br>hERG= 0.64 (0.25)<br>SI= 0.21<br>OB: Poor     | CYP3A4= 0.88 (0.36) , 0.34 (0.26)<br>CYP2D6= 0.71 (0.28) , 0.23 (0.13) | IP = 250 (0.18)<br>OR = 970 (0.28)<br>IV = 110 (0.79)<br>SC = 330 (0.52)     | 0.03/0.08                  |
| 6604199     | Lm: 5 ± 0.1<br>A549: 1903 ± 1400  | 210/20/5                              | AMES= 0.048 (0.6)<br>hERG= 0.01 (0.31)<br>SI= 0.3<br>OB: Good       | CYP3A4= 0.1 (0.49) , 0.03 (0.66)<br>CYP2D6= 0.01 (0.74) , 0.01 (0.66)  | IP = 36.15 (0.62)<br>OR = 96.4 (0.4)<br>IV = 81.54 (0.78)<br>SC = 220 (0.63) | 0.2/0.1                    |
| 9549148     | Lm: 137 ± 40<br>A549: >5000       | 200/7/0                               | AMES= 0.115 (0.27)<br>hERG= 0.88 (0.21)<br>SI= 0.39<br>OB: Moderate | CYP3A4= 0.54 (0.24) , 0.03 (0.48)<br>CYP2D6= 0.87 (0.09) , 0.63 (0.14) | IP = 150 (0.51)<br>OR = 500 (0.5)<br>IV = 27.55 (0.57)<br>SC = 270 (0.44)    | 0.06/0.1                   |
| 9549170     | Lm: 164 ± 11<br>A549: 72 ± 5      | 176/25/2                              | AMES= 0.42 (0.31)<br>hERG= 0 (0.26)<br>SI= 0.3<br>OB: Poor          | CYP3A4= 0.04 (0.56) , 0.01 (0.61)<br>CYP2D6= 0.01 (0.74) , 0.01 (0.66) | IP = 220 (0.21)<br>OR = 91.34 (0.35)<br>IV = 120 (0.38)<br>SC = 720 (0.29)   | 0.2/0.3                    |
| 9550329     | Lm: 50 ± 0.1<br>A549: >5000       | 216/23/9                              | AMES= 0.112 (0.39)<br>hERG= 0.23 (0.37)<br>SI= 0.69<br>OB: Poor     | CYP3A4= 0.82 (0.37) , 0.17 (0.4)<br>CYP2D6= 0.08 (0.32) , 0.02 (0.29)  | IP = 120 (0.47)<br>OR = 570 (0.51)<br>IV = 32.35 (0.3)<br>SC = 220 (0.37)    | 0.05/0.1                   |
| 11293258    | Lm: 10 ± 2<br>A549: 1296 ± 76     | 167/23/8                              | AMES= 0.897 (0.58)<br>hERG= 0.96 (0.32)<br>SI= 0.39<br>OB: Moderate | CYP3A4= 0.36 (0.28) , 0.05 (0.52)<br>CYP2D6= 0.27 (0.15) , 0.08 (0.4)  | IP = 160 (0.27)<br>OR = 450 (0.47)<br>IV = 37 (0.38)<br>SC = 530 (0.46)      | 0.03/0.04                  |
| 11834429    | Lm: 142 ± 32<br>A549: >5000       | 188/3/0                               | AMES= 0.095 (0.29)<br>hERG= 0.4 (0.09)<br>SI= 0.39<br>OB: Moderate  | CYP3A4= 0.51 (0.16) , 0.15 (0.19)<br>CYP2D6= 0.69 (0.1) , 0.69 (0.15)  | IP = 360 (0.56)<br>OR = 600 (0.54)<br>IV = 68.39 (0.53)<br>SC = 1100 (0.51)  | 0.06/0.07                  |
| 11834470    | Lm: 211 ± 47<br>A549: >5000       | 200/24/3                              | AMES= 0.641 (0.22)<br>hERG= 0.26 (0.09)<br>SI= 0.84<br>OB: Moderate | CYP3A4= 0.76 (0.12) , 0.18 (0.34)<br>CYP2D6= 0.24 (0.37) , 0.07 (0.24) | IP = 280 (0.49)<br>OR = 1100 (0.48)<br>IV = 68.33 (0.3)<br>SC = 130 (0.26)   | 0.1/0.09                   |

| Pubchem CID | EC <sub>50</sub> (nM)<br>Ave ± SD | Pubchem AID/Active<br>Flags/Confirmed | Predictive <i>in silico</i> ADMET                                   |                                                                        |                                                                                |                            |
|-------------|-----------------------------------|---------------------------------------|---------------------------------------------------------------------|------------------------------------------------------------------------|--------------------------------------------------------------------------------|----------------------------|
|             |                                   |                                       | Test (RI)                                                           | [CYP] IC <sub>50</sub> < 50 uM ,<br>IC <sub>50</sub> < 10 uM (RI)      | Mouse LD <sub>50</sub><br>(mg/kg) (RI)                                         | Tanimoto Score<br>(SSG/AB) |
| 11948854    | Lm: 607 ± 166<br>A549: >5000      | 180/4/0                               | AMES= 0.081 (0.2)<br>hERG= 0.92 (0.31)<br>SI= 0.81<br>OB: Moderate  | CYP3A4= 0.39 (0.09) , 0.04 (0.21)<br>CYP2D6= 0.55 (0.3) , 0.15 (0.3)   | IP = 780 (0.73)<br>OR = 270 (0.9)<br>IV = 230 (0.75)<br>SC = 210 (0.4)         | 0.04/0.01                  |
| 11957314    | Lm: 205 ± 21<br>A549: 1143 ± 53   | 200/26/3                              | AMES= 0.345 (0.1)<br>hERG= 0.98 (0.25)<br>SI= 0.71<br>OB: Poor      | CYP3A4= 0.19 (0.48) , 0.06 (0.55)<br>CYP2D6= 0.75 (0.37) , 0.24 (0.14) | IP = 77.01 (0.58)<br>OR = 970 (0.51)<br>IV = 14.72 (0.68)<br>SC = 320 (0.5)    | 0/0.01                     |
| 11958710    | Lm: 174 ± 32<br>A549: >5000       | 193/10/1                              | AMES= 0.616 (0.2)<br>hERG= 0.84 (0.12)<br>SI= 0.72<br>OB: Poor      | CYP3A4= 0.53 (0.14) , 0.04 (0.38)<br>CYP2D6= 0.39 (0.24) , 0.17 (0.28) | IP = 24.37 (0.38)<br>OR = 65.56 (0.69)<br>IV = 12.2 (0.22)<br>SC = 35.08 (0.3) | 0.02/0.03                  |
| 12004512    | Lm: 746 ± 211<br>A549: >5000      | 162/6/2                               | AMES= 0.37 (0.42)<br>hERG= 0.03 (0.27)<br>SI= 0.48<br>OB: Poor      | CYP3A4= 0.96 (0.86) , 0.48 (0.3)<br>CYP2D6= 0.05 (0.39) , 0 (0.41)     | IP = 47.19 (0.13)<br>OR = 450 (0.42)<br>IV = 6.34 (0.23)<br>SC = 38.47 (0.33)  | 0.08/0.2                   |
| 12004742    | Lm: 491 ± 92<br>A549: >5000       | 181/25/10                             | AMES= 0.477 (0.21)<br>hERG= 0.94 (0.12)<br>SI= 0.68<br>OB: Poor     | CYP3A4= 0.66 (0.17) , 0.09 (0.26)<br>CYP2D6= 0.31 (0.2) , 0.34 (0.18)  | IP = 11.02 (0.06)<br>OR = 140 (0.12)<br>IV = 8.4 (0.36)<br>SC = 110 (0.25)     | 0.07/0.1                   |
| 12005597    | Lm: 629 ± 107<br>A549: 4067 ± 721 | 172/19/6                              | AMES= 0.049 (0.54)<br>hERG= 0.99 (0.56)<br>SI= 0.67<br>OB: Poor     | CYP3A4= 0.09 (0.53) , 0.06 (0.66)<br>CYP2D6= 0.32 (0.38) , 0.11 (0.45) | IP = 46.51 (0.51)<br>OR = 700 (0.46)<br>IV = 23.31 (0.69)<br>SC = 350 (0.55)   | 0.03/0.05                  |
| 13481921    | Lm: 229 ± 34<br>A549: >5000       | 166/11/0                              | AMES= 0.646 (0.16)<br>hERG= 0.96 (0.19)<br>SI= 0.72<br>OB: Poor     | CYP3A4= 0.4 (0.26) , 0.1 (0.58)<br>CYP2D6= 0.78 (0.5) , 0.48 (0.35)    | IP = 41.73 (0.46)<br>OR = 130 (0.44)<br>IV = 18.84 (0.44)<br>SC = 29.98 (0.37) | 0/0.01                     |
| 15944965    | Lm: 849 ± 99<br>A549: >5000       | 168/14/3                              | AMES= 0.254 (0.26)<br>hERG= 0.87 (0.13)<br>SI= 0.73<br>OB: Moderate | CYP3A4= 0.67 (0.12) , 0.11 (0.51)<br>CYP2D6= 0.69 (0.2) , 0.42 (0.17)  | IP = 580 (0.39)<br>OR = 480 (0.27)<br>IV = 60.54 (0.41)<br>SC = 130 (0.32)     | 0.04/0.07                  |
| 15944971    | Lm: 505 ± 54<br>A549: >5000       | 166/23/5                              | AMES= 0.841 (0.25)<br>hERG= 0.97 (0.23)<br>SI= 0.7<br>OB: Poor      | CYP3A4= 0.68 (0.12) , 0.08 (0.48)<br>CYP2D6= 0.56 (0.1) , 0.35 (0.13)  | IP = 76.17 (0.15)<br>OR = 290 (0.22)<br>IV = 12.69 (0.31)<br>SC = 48.86 (0.16) | 0.02/0.04                  |
| 15945170    | Lm: 178 ± 36<br>A549: >5000       | 164/2/0                               | AMES= 0.454 (0.19)<br>hERG= 0.22 (0.21)<br>SI= 0.16<br>OB: Poor     | CYP3A4= 0.37 (0.12) , 0.01 (0.43)<br>CYP2D6= 0.28 (0.27) , 0.07 (0.28) | IP = 680 (0.48)<br>OR = 1700 (0.19)<br>IV = 13.24 (0.43)<br>SC = 1000 (0.31)   | 0.1/0.2                    |
| 15945780    | Lm: 184 ± 12<br>A549: >5000       | 168/10/1                              | AMES= 0.425 (0.14)<br>hERG= 0.8 (0.14)<br>SI= 0.3<br>OB: Moderate   | CYP3A4= 0.28 (0.19) , 0.04 (0.45)<br>CYP2D6= 0.58 (0.38) , 0.26 (0.35) | IP = 24.19 (0.54)<br>OR = 550 (0.41)<br>IV = 29.82 (0.61)<br>SC = 110 (0.4)    | 0.03/0.03                  |
| 16187569    | Lm: 165 ± 25<br>A549: >5000       | 151/2/0                               | AMES= 0.188 (0.13)<br>hERG= 0.9 (0.17)<br>SI= 0.62<br>OB: Moderate  | CYP3A4= 0.34 (0.16) , 0.03 (0.3)<br>CYP2D6= 0.48 (0.08) , 0.24 (0.27)  | IP = 320 (0.4)<br>OR = 520 (0.58)<br>IV = 47.74 (0.41)<br>SC = 260 (0.43)      | 0.1/0.1                    |

| Pubchem<br>CID | EC <sub>50</sub> (nM)<br>Ave ± SD | Pubchem AID/Active<br>Flags/Confirmed | Predictive <i>in silico</i> ADMET                                   |                                                                        |                                                                                |                            |
|----------------|-----------------------------------|---------------------------------------|---------------------------------------------------------------------|------------------------------------------------------------------------|--------------------------------------------------------------------------------|----------------------------|
|                |                                   |                                       | Test (RI)                                                           | [CYP] IC <sub>50</sub> < 50 uM ,<br>IC <sub>50</sub> < 10 uM (RI)      | Mouse LD <sub>50</sub><br>(mg/kg) (RI)                                         | Tanimoto Score<br>(SSG/AB) |
| 16187595       | Lm: 14 ± 13<br>A549: >5000        | 145/2/0                               | AMES= 0.066 (0.29)<br>hERG= 0.34 (0.04)<br>SI= 0.7<br>OB: Moderate  | CYP3A4= 0.39 (0.23) , 0.02 (0.3)<br>CYP2D6= 0.45 (0.19) , 0.24 (0.46)  | IP = 180 (0.32)<br>OR = 1500 (0.57)<br>IV = 36.81 (0.45)<br>SC = 150 (0.37)    | 0.02/0.06                  |
| 16187738       | Lm: 511 ± 44<br>A549: >5000       | 149/2/0                               | AMES= 0.157 (0.2)<br>hERG= 0.68 (0.1)<br>SI= 0.48<br>OB: Moderate   | CYP3A4= 0.2 (0.09) , 0.01 (0.26)<br>CYP2D6= 0.45 (0.25) , 0.33 (0.25)  | IP = 300 (0.26)<br>OR = 760 (0.41)<br>IV = 36.53 (0.6)<br>SC = 340 (0.52)      | 0.09/0.1                   |
| 16189740       | Lm: 571 ± 113<br>A549: >5000      | 146/2/0                               | AMES= 0.013 (0.14)<br>hERG= 0.48 (0.07)<br>SI= 0.84<br>OB: Moderate | CYP3A4= 0.5 (0.26) , 0.1 (0.34)<br>CYP2D6= 0.29 (0.2) , 0.2 (0.27)     | IP = 110 (0.7)<br>OR = 550 (0.59)<br>IV = 27.54 (0.2)<br>SC = 86.87 (0.41)     | 0.04/0.06                  |
| 16192568       | Lm: 301 ± 50<br>A549: >5000       | 148/2/0                               | AMES= 0.624 (0.5)<br>hERG= 0.14 (0.19)<br>SI= 0.3<br>OB: Moderate   | CYP3A4= 0.31 (0.24) , 0.1 (0.38)<br>CYP2D6= 0.1 (0.44) , 0.01 (0.54)   | IP = 1100 (0.39)<br>OR = 520 (0.59)<br>IV = 130 (0.66)<br>SC = 270 (0.69)      | 0.12/0.07                  |
| 16192591       | Lm: 357 ± 56<br>A549: 3754 ± 623  | 153/5/0                               | AMES= 0.073 (0.5)<br>hERG= 0.68 (0.14)<br>SI= 0.44<br>OB: Moderate  | CYP3A4= 0.29 (0.19) , 0.04 (0.47)<br>CYP2D6= 0.34 (0.22) , 0.09 (0.26) | IP = 220 (0.6)<br>OR = 490 (0.72)<br>IV = 41.19 (0.67)<br>SC = 160 (0.37)      | 0.01/0.04                  |
| 16196001       | Lm: 50 ± 9<br>A549: >5000         | 146/2/0                               | AMES= 0.403 (0.15)<br>hERG= 0.72 (0.37)<br>SI= 0.72<br>OB: Poor     | CYP3A4= 0.45 (0.39) , 0.12 (0.34)<br>CYP2D6= 0.39 (0.19) , 0.18 (0.22) | IP = 57.67 (0.55)<br>OR = 330 (0.55)<br>IV = 12.85 (0.56)<br>SC = 200 (0.33)   | 0.04/0.06                  |
| 16196006       | Lm: 703 ± 44<br>A549: >5000       | 145/5/1                               | AMES= 0.21 (0.11)<br>hERG= 1 (0.43)<br>SI= 0.64<br>OB: Poor         | CYP3A4= 0.72 (0.47) , 0.32 (0.35)<br>CYP2D6= 0.79 (0.33) , 0.29 (0.34) | IP = 14.24 (0.61)<br>OR = 470 (0.33)<br>IV = 1.66 (0.41)<br>SC = 20.73 (0.36)  | 0.03/0.03                  |
| 16196223       | Lm: 18 ± 2<br>A549: 2325 ± 205    | 156/18/2                              | AMES= 0.469 (0.13)<br>hERG= 0.96 (0.4)<br>SI= 0.7<br>OB: Poor       | CYP3A4= 0.78 (0.15) , 0.12 (0.2)<br>CYP2D6= 0.63 (0.33) , 0.34 (0.22)  | IP = 51.41 (0.54)<br>OR = 350 (0.27)<br>IV = 11.38 (0.55)<br>SC = 74.17 (0.36) | 0.01/0.05                  |
| 16196319       | Lm: 15 ± 1<br>A549: >5000         | 150/11/1                              | AMES= 0.304 (0.12)<br>hERG= 0.92 (0.33)<br>SI= 0.71<br>OB: Poor     | CYP3A4= 0.69 (0.2) , 0.05 (0.32)<br>CYP2D6= 0.42 (0.32) , 0.29 (0.21)  | IP = 23.87 (0.48)<br>OR = 400 (0.31)<br>IV = 13.55 (0.59)<br>SC = 70.87 (0.37) | 0.01/0.08                  |
